1 **The use of a Cohort Size Shrinkage Index (CSSI) to quantify**  
2 **regional famine intensity during the Chinese famine of 1959-1961**

3

4 Chunyu Liu<sup>1†</sup>, Chihua Li<sup>2,3†</sup>, Hongwei Xu<sup>4</sup>, Zhenwei Zhou<sup>5</sup>, L.H. Lumey<sup>2</sup>

5 1. Department of Epidemiology and Biostatistics, School of Public Health, Peking University,  
6 Beijing, China

7 2. Department of Epidemiology, Mailman School of Public Health, Columbia University, New  
8 York, NY, USA

9 3. Zhengzhou Central Hospital Affiliated to Zhengzhou University, Henan, China

10 4. Department of Sociology, Queens College, City University of New York, New York, NY,  
11 USA

12 5. Department of Biostatistics, Boston University School of Public Health, Boston, MA, USA

13 †C.L. and C.L. contributed equally to this work.

14

15 \*Correspondence to Prof. L.H. Lumey M.D.

16 Department of Epidemiology

17 Mailman School of Public Health

18 Columbia University

19 722 W 168th St, 1617A

20 New York, NY 10032.

21 [lumey@columbia.edu](mailto:lumey@columbia.edu)

22 [Tel: +1 212-305-9222](tel:+12123059222)

23 **ABSTRACT**

24 The Cohort Size Shrinkage Index (CSSI) is the most widely used intensity measure in studies of  
25 the Chinese famine of 1959-1961. We examined requirements to construct a valid CSSI measure:  
26 reliable information on birth cohort size; a stable cohort size trend outside the famine years; and  
27 limited migrations. We used census data to examine the cohort size trend and concentrated on the  
28 time window of 1950-1970 to exclude events with a large impact on cohort size trends other than  
29 the famine. We observed a significant difference in cohort size trends comparing pre-famine and  
30 post-famine births. Compared to pre-famine based CSSI (p-CSSI), pre- & post-famine based  
31 CSSI (pp-CSSI) tends to overestimate famine intensity at higher mean CSSI levels and  
32 underestimate intensity at lower mean levels. In Sichuan province, we demonstrated a less  
33 pronounced dose-response relation between famine intensity and tuberculosis outcomes using p-  
34 CSSI as compared to pp-CSSI. These observations demonstrates that the CSSI is not a robust  
35 measure as had been assumed previously. We recommend the use of p-CSSI and encourage  
36 researchers to re-examine their results of Chinese famine studies.

37

38 **KEYWORDS** Chinese, Regional famine intensity, Birth cohort trend, Dose-response,  
39 Tuberculosis after famine

## 40 **Introduction**

41 The Great Chinese Famine of 1959-1961 (Chinese famine) originated from a combination of  
42 radical agricultural and economic policies and crop failures (Cao 2005; Chang and Wen 1998;  
43 Lin and Yang 1998, 2000; Yang 1996). The famine led to over 30 million excess deaths and is  
44 the largest famine recorded (Chang and Wen 1997; Garnaut 2014; Peng 1987; Zhao and  
45 Reimondos 2012). It had different intensity levels across regions (Ashton et al. 1992; Cao 2005;  
46 Chang and Wen 1997; Peng 1987). There has been an extensive literature on the famine's  
47 demographic consequences (Aird 1982; Ashton et al. 1992; Banister 1984; Cai and Feng 2005;  
48 Coale and Banister 1994), its main causes (Chang and Wen 1998; Kasahara and Li 2020; Kung  
49 and Lin 2003; Meng, Qian and Yared 2015), and its potential long-term health and economic  
50 impact (Almond et al. 2007; Fan and Qian 2015; Li and Lumey 2017; Xu et al. 2016). Chinese  
51 famine studies rely heavily on appropriate indicators of famine intensity as these are being used  
52 either as dependent or as independent variables in statistical models to address specific research  
53 questions (Li and Lumey 2017; Li et al. 2019).

54  
55 It has been a challenge to construct robust indicators of the famine's intensity. First, there is no  
56 general agreement on what elements should be used to define and assess a famine's intensity and  
57 magnitude (Gráda 2009; Howe and Devereux 2004). An optimal measure will depend on the  
58 field of research and specific research questions. Second, there is scant reliable information on  
59 food availability and consumption at the time of Chinese famine and mortality data are  
60 incomplete (Li and Lumey 2017; Li et al. 2019; Lumey, Stein and Susser 2011). Facing these  
61 challenges, scholars have proposed a number of demographic indicators to quantify regional  
62 famine intensity in China (Li 2022). These include the excess death rate (EDR) (Chang and Wen

63 1998; Peng 1987; Yang 1996), the cohort size shrinkage index (CSSI) (Huang et al. 2010b; Xu et  
64 al. 2016), the abnormal death proportion (Cao 2005; Song, Wang and Hu 2009), and the infant  
65 mortality rate (Song et al. 2009). Although none of the indicators are direct measures of famine  
66 intensity - as this would require recording individual level calorie intakes, they do reflect  
67 demographic changes caused by a famine and capture important aspects of a famine's intensity.

68  
69 Among famine intensity measures, the EDR and CSSI have traditionally been the most widely  
70 used. In recent years, the CSSI has enjoyed a growing popularity as an alternative to the EDR,  
71 especially in economics and the health sciences (**Figure 1**). This is because of concerns about the  
72 quality of mortality statistics at the time of the famine and their limited accessibility at the local  
73 prefecture and county levels (Huang et al. 2010b; Xu et al. 2016). CSSIs avoid these potential  
74 problems as they are derived from population census data that are deemed to be more reliable.  
75 CSSIs have therefore been increasingly applied to relate famine intensity to later economic and  
76 health outcomes in populations affected by famine (**Table A1 of the online Appendix**).

77  
78 The CSSI compares observed cohort sizes of populations born in famine years to expected cohort  
79 sizes in the absence of famine and is estimated by averaging cohort sizes of pre- & post-famine  
80 births (Huang et al. 2010b; Xu et al. 2016). There has been little consistency, however, in exactly  
81 how CSSIs were constructed or applied in different studies. There has been a wide variety in the  
82 selection of data sources, estimating methods, geographic regions, and definitions of famine and  
83 non-famine years (**Table A1**). Almost all studies combined pre- & post-famine births to estimate  
84 an expected cohort size for famine years (**Figure A1**). As we later demonstrate, CSSIs estimated  
85 from pre- & post-famine births can introduce unrecognized biases when estimating a potential

86 dose-response relationship between famine intensity and later health outcomes when pre-famine  
87 and post-famine cohort trends are different(Li, Zhou and Lumey 2021).

88  
89 For CSSI to be a useful measure of famine intensity at the local level, reliable information will  
90 be needed on several variables: first on the size of birth cohorts, perhaps from census data at the  
91 province or prefecture level; second, to confirm a stable cohort size trend over time in the non-  
92 famine period as this will be needed to identify any famine related deviations from existing  
93 trends, and third, on migrations between localities if place of birth is not known and populations  
94 have to be classified instead by current residence, an imperfect indicator of place of birth (Xu et  
95 al. 2016; Xu et al. 2018). To date, no studies have examined the adequacy of the information  
96 used to construct CSSIs. Also, it remains unknown how sensitive CSSI measures are to  
97 variations in their component parts. These variations include data sources and estimating  
98 methods.

99  
100 In this study, we use the 1% China 2000 Census as the main data source to examine cohort sizes  
101 by year of birth. We construct CSSIs using varying combinations of non-famine years (pre-  
102 famine years vs pre- & post-famine years) and then compare CSSI distributions at the province  
103 and prefecture levels. We examine the impact of migrations on CSSI by comparing place of birth  
104 and residence from census information. We use the tuberculosis surveillance study in Sichuan  
105 province as a case-study to examine how empirical results may change with the application of  
106 CSSIs using non-famine years as reference (Cheng et al. 2021; Cheng et al. 2020; Li et al. 2021).  
107 Our findings demonstrate that the choice of non-famine years is by far the most important  
108 determinant of CSSI, shaping both its distribution and the results of empirical studies.

109

## 110 **Data and Methods**

### 111 **Main Data and Variables**

112 To date, cohort size shrinkage indexes (CSSIs) at different regional levels have been used by  
113 over 30 Chinese famine studies, using different national census waves collected between 1982-  
114 2000. (**Table A1**). This study is mainly based on the 1% China 2000 Census  
115 (<https://international.ipums.org/international/>) (Minnesota Population Center 2020), because it  
116 provides the most extensive demographic information, including birth year, place of birth at the  
117 province level, and place of residence both at the prefecture and province levels (Lavelly 2001).  
118 This enables comparison of place of birth and place of residence to examine inter-province  
119 migrations. The 1% China 1982 and 1990 census do not provide information on place of birth  
120 but will be important for sensitivity analysis as described later.

121

122 Our study includes 29 province level regions and 340 prefectures. The province level regions  
123 are: Sichuan (SC), Anhui (AH), Guizhou (GZ), Hunan (HuN), Henan (HeN), Qinghai (QH),  
124 Jiangsu (JS), Ningxia (NX), Guangxi (GX), Gansu (GS), Shandong (SD), Yunan (YN), Hubei  
125 (HuB), Fujian (FJ), Hebei (HeB), Zhejiang (ZJ), Jiangxi (JX), Guangdong (GD), Liaoning (LN),  
126 Shanxi (SX), Shaanxi (SaX), Jilin (JL), Inner Mongolia (IM), and Heilongjiang (HLJ). Before  
127 the 1980s, Hainan was part of Guangdong province, and Chongqing (CQ) was part of Sichuan  
128 province. Separately grouped are the province level regions formed by the cities of Beijing (BJ),  
129 Tianjin (TJ) and Shanghai (SH) where population policies were different than in other regions  
130 and early family planning policies were introduced in the 1960s (Yang 2004). Also grouped  
131 apart are the two provinces Xinjiang (XJ) and Tibet (TB) to which government population

132 policies encouraged active immigration (Sabit and Mamat 2008). We arranged the above listing  
133 of the 24 regular provinces by CSSI rank from the highest to the lowest and separately show the  
134 three city provinces and the two active immigration provinces (see also **Table A3**).

135

### 136 **Cohort Size Projection and CSSI Construction**

137 The 2000 census includes births between 1900 and 2000. For optimal CSSI estimates, a  
138 relatively stable period for births will be required to use as a reference period against which to  
139 identify deviations caused by the famine. We selected the period 1950-1970 as the most suited  
140 for this purpose because its start marks the establishment of the People's Republic of China in  
141 1949 after chaotic periods of the Second Sino-Japanese War and the Chinese Civil War (Coale  
142 and Chen 1987; Xizhe 1989). And its end marks the introduction of family planning policies  
143 across China in the 1970s (Poston 1992). This window also includes the famine and non-famine  
144 years selected by previous Chinese famine studies that used CSSIs (**Figure A1**).

145

146 These famine studies calculated CSSI as  $\frac{N_{\text{non-famine}} - N_{\text{famine}}}{N_{\text{non-famine}}}$  at different regional levels, where

147  $N_{\text{famine}}$  is the observed average cohort size of famine births and  $N_{\text{non-famine}}$  is the average  
148 cohort size of the combined pre- & post-famine births. The  $N_{\text{non-famine}}$  is assumed to reflect the  
149 expected cohort size in the absence of famine. However, the potential impact of different trends  
150 of pre-famine and post-famine births on CSSI has not been systematically examined before.

151 Trends could be different because post-famine births in China show a rebound after the famine  
152 and this rebound could be related to the severity of the decline (Li et al. 2021). Therefore, CSSIs  
153 may also be sensitive to the choice of non-famine years (pre-famine years vs. pre- & post-famine  
154 years combined).

155  
156 To examine these questions, we divided the period of 1950-1970 into three periods and defined  
157 1950-1957 as pre-famine years, 1959-1961 as famine years, and 1963-1970 as post-famine years.  
158 We excluded births in 1958 or 1962 from analysis because births in these years could be  
159 misclassified on famine exposure status comparing different provinces with different famine start  
160 and end years. We examined birth trends based on pre-famine births and post-famine births alone  
161 and compared trends at the regional level.

162  
163 We compared two approaches to estimating birth deficits during the famine period. The first  
164 examines deviations from expectations based on a linear extrapolation of pre-famine births  
165 (1950-1957) and the second examines deviations from the commonly used linear interpolation of  
166 combined pre- & post-famine births (1950-1957 & 1963-1970). This corresponds to calculating  
167 CSSIs from either pre-famine birth cohorts alone (p-CSSI) or combining pre- & post-famine  
168 birth cohorts together (pp-CSSI). Both p-CSSI and pp-CSSI were mapped at the province and  
169 prefecture levels. In sensitivity analyses, we compared findings based on the 1% China 1990  
170 population census and examined the robustness of CSSI measures to variations in the exact years  
171 defined as non-famine years.

### 172 173 **Applying CSSIs to Tuberculosis Surveillance Study in the Sichuan Province**

174 We applied the p-CSSI and pp-CSSI approaches to the empirical study in the Sichuan province  
175 of tuberculosis cases diagnosed between 2005 and 2018 (Cheng et al. 2020). The study data were  
176 publicly available at the Github repository [https://github.com/qu-cheng/TB\\_famine](https://github.com/qu-cheng/TB_famine). In line with  
177 previous approaches, we evaluated associations between famine intensity and tuberculosis risk



178 by mixed-effects meta-regressions. (Cheng et al. 2021; Cheng et al. 2020; Li et al. 2021). For  
179 famine births, we fit linear models to examine the relation between famine intensity as  
180 represented by CSSI on the log of the ratio of the observed vs expected non-famine incidence  
181 rates. We modeled multiple sets of CSSI using either varying combinations of non-famine years  
182 (pre-famine years vs pre- & post-famine years) at the prefecture level in Sichuan province or the  
183 full Sichuan 2000 Census or the 1% China 2000 Census for Sichuan province.

184

## 185 **Results**

### 186 **Cohort Size Trends Differ When Selecting Either Pre-Famine or Post-Famine Births as the** 187 **Non-Famine Population**

188 Panel a of **Figure 2** shows the observed cohort sizes by birth year between 1900 and 2000 at the  
189 national level as documented by the 1% China 2000 Census. For individuals born until the late  
190 1950s, a monotone relation is seen between higher mortality and advancing age, demonstrating  
191 the smallest number of survivors among the oldest individuals. The trend is interrupted in three  
192 periods that show a marked decline in cohort size: for individuals born between 1958-1962,  
193 1971-1980, and after 1990. A similar pattern is seen at the province level (**Figure A2**).

194

195 Panel b of **Figure 2** shows the cohort size pattern between 1950 and 1970 and compares the  
196 national cohort size trend among pre-famine births (1950-1957) (Red hatched line) to post-  
197 famine births (1963-1970) (Blue hatched line). The first trend increases by birth year while the  
198 second is flat. At the province level, the pre-famine based cohort size trends are also different  
199 from the post-famine based trends (**Figure A3**). These differences remain after excluding the  
200 birth peak in 1963 immediately after the famine ended.

201  
202 **CSSI Estimates Also Critically Depend on the Choice of Non-Famine Years**  
203 Because cohort size trends differ for pre-famine births and post-famine births, estimated CSSIs  
204 will likely vary depending on the choice of non-famine births. We compared the observed cohort  
205 sizes of famine births in 1959-1961 with the projected populations in these years estimated from  
206 linear regressions at the province level using either the pre-famine births (1950-1957) alone or  
207 the pre- & post-famine births (1950-1957 & 1963-1970) combined (**Table A2**). The projected  
208 populations are larger than the observed populations in all provinces. The estimated birth deficits  
209 also vary with the choice of non-famine years: estimated CSSIs based on pre-famine births as  
210 non-famine years (p-CSSI) differ from CSSIs based on pre- & post-famine births as non-famine  
211 years (pp-CSSI). **Table A3** shows the CSSI values and rankings for all provinces. The difference  
212 between p-CSSI and pp-CSSI ranges from -16.2% in Qinghai province (35.4% vs 51.6%) to  
213 +14.1% in Liaoning province (38.0% vs 23.9%). It is more extreme for the five regions grouped  
214 separately, ranging from -60.6% in Xinjiang (-38.8% vs 21.8%) to +39.3% in Shanghai (38.5%  
215 vs -0.8%) (**Table A4**).

216  
217 The geographical distribution of CSSIs is shown in **Figure 3**, with p-CSSI in Panel a and pp-  
218 CSSI in Panel b. The Sichuan, Anhui, Guizhou and Hunan provinces show the largest estimated  
219 shrinkage regardless of estimation method. pp-CSSIs tend to be higher than p-CSSIs in the  
220 Midwest of China however and lower in the Northeast and Southeast of China (Panel c).  
221 Compared to p-CSSIs, pp-CSSIs tend to be systematically larger at higher CSSI values and  
222 smaller at lower values with a crossover at the mean (Panel d). Although p-CSSI and pp-CSSI

223 have similar mean values (37.4% vs 37.7%), their distributions differ, the former values being  
224 spread more narrowly around the mean (SD 9.8) than the latter (SD 14.5) (Appendix **Figure A4**).

225

### 226 **Other Factors Besides the Choice of Non-Famine Years Have Little Effect on CSSI**

227 First, our findings do not depend on the choice of census waves. The 1% China 1990 Census has  
228 been the most widely used data source for previous studies although place of birth was not  
229 available (**Table A1**). CSSIs as estimated from the 1% 1990 census show the same cross-over  
230 pattern (**Figure A5**) as the 1% 2000 census. Second, we compared p-CSSI using place of  
231 residence from the 1990 or the 2000 census and place of birth from the 2000 census. The  
232 findings are highly consistent with inter-correlations exceeding 0.95 (**Table A5**). Third, p-CSSI  
233 estimates are robust to adding a quadratic term to linear regression trend extrapolations; fourth,  
234 to changing pre-famine years from 1950-1957 to 1940-1957; and fifth, to limiting analysis to the  
235 rural population instead of the entire population, with inter-correlations ranging from 0.95 to  
236 0.99 for all comparisons.

237

### 238 **P-CSSI And Pp-CSSI are not Only Different at the Provincial but Also at the Prefecture** 239 **Level**

240 Because information on place of birth at the prefecture level was not available in any of the  
241 census waves, CSSI at this level was constructed instead using place of residence. **Figure 4**  
242 shows spatial variations of residence based CSSIs at both the province and prefecture levels.  
243 Panels a to c of **Figure 4** are comparable to those of **Figure 3**, showing findings at the province  
244 level using either information on place of birth or place of residence. Panels d and e of **Figure 4**  
245 show substantial variations at the prefecture level within most provinces. This is illustrated

246 numerically by the wide range of p-CSSI at the prefecture level (**Table A6**). Panel f of **Figure 4**  
247 shows that the differences between p-CSSI and pp-CSSI at the province level also hold at the  
248 prefecture level. In the online Appendix, **Table A7** presents p-CSSIs and pp-CSSIs at the  
249 prefecture level for use in future comparative studies.

250

### 251 **Differences in P-CSSI and Pp-CSSI Characteristics Generate a Different Dose-Response** 252 **Pattern Comparing Famine Intensity to Adult Health**

253 A recent study in Sichuan province used the pp-CSSI to report a dose-response relationship  
254 between famine intensity and adulthood tuberculosis at the prefecture level (Cheng et al. 2020).  
255 We compared p-CSSI and pp-CSSI in this study. p-CSSI had a smaller mean and wider range  
256 compared to pp-CSSI (**Table A8**). Using the reported full 2000 Sichuan Census (Cheng et al.  
257 2021), the dose-response estimate for (log) tuberculosis IRR in relation to a CSSI unit increase  
258 was less than half for p-CSSI compared to pp-CSSI (IRR 0.38; 95% CI: -0.12, 0.88 vs IRR 0.91;  
259 95% CI: 0.19, 1.62) (**Figure 5 and Table A9**). By bootstrapping, we estimated a significant IRR  
260 difference between the two estimates (0.55; 95% CI: 0.06, 10.4). This demonstrates how  
261 sensitive CSSIs can be to the choice of non-famine years and their effect on estimated relations  
262 between famine intensity and later health outcomes.

263

264 The p-CSSI based IRR is not sensitive to changes in the time window used to define pre-famine  
265 years, with an IRR of 0.37 (95% CI: -0.12, 0.86) using 1949-57 as pre-famine years and 0.40  
266 (95% CI: -0.02, 0.82) using 1945-57 as pre-famine years compared to 0.38 (as in the above) for  
267 years 1950-1957. Findings using the 1% China 2000 Census data for Sichuan agree with these  
268 results from the full Sichuan 2000 Census.

269

## 270 **Discussion**

271 In this study, we examined alternative approaches to construct CSSIs in Chinese famine studies  
272 and reviewed study findings based on this measure. We established that CSSI distributions can  
273 be highly sensitive to the choice of non-famine years (pre-famine years vs. pre- & post-famine  
274 years combined). This demonstrates that CSSI is not a robust estimator of famine intensity. By  
275 contrast, the choice of census waves, the use of province of residence vs province of birth, the  
276 exact timing of pre-famine years, and the form of statistical extrapolation models had little  
277 impact on CSSI. Perhaps of greater importance, we demonstrated that different CSSIs (p-CSSI  
278 vs. pp-CSSI) will generate a different understanding of the relation between famine intensity and  
279 later life health outcomes.

280

281 For Chinese famine studies, it is critically important to select time windows that are as free as  
282 possible from extraneous events (Garnaut 2014; Peng 1987; Zhao and Reimondos 2012). As an  
283 example of later post-famine events, family planning pilot programs introduced in some regions  
284 from the 1960s and nationwide in the 1970s most likely contributed to the cohort size trend  
285 irregularities observed by others for individuals (Aird 1982; Attane 2002; Poston Jr and Gu  
286 1987). We took these circumstances into account by examining large cities in separate strata and  
287 limiting our post-famine observations to births 1963-1970.

288

289 Chinese famine studies to date have also failed to recognize that the cohort size trends among  
290 pre-famine births and post-famine births differ too much for pp-CSSI to be representative of a  
291 general trend. That this leads to biases can be seen from the comparison of pp-CSSI with p-CSSI

292 measures that show systematic differences over the CSSI range: pp-CSSI tends to be  
293 systematically larger than p-CSSI at higher means of CSSI and lower at lower means of CSSI. A  
294 high correlation between declines in famine births and post-famine rebounds was already  
295 reported before (Huang et al. 2014; Huang et al. 2010a; Huang et al. 2010b; Huang et al. 2013).  
296 Our study confirms these observations based on a correlation of -0.36 and this finding was one of  
297 our motivations to recommend against the use of pp-CSSI. Other famine studies that also  
298 avoided pp-CSSI include the examination of excess deaths in China (Peng 1987) and in Ukraine  
299 for the 1932-1933 famine (Rudnytskyi et al. 2015).

300  
301 Other factors besides including post-famine births had a limited impact on CSSI estimates. First,  
302 on the use of the 1% China 2000 Census as our main data source, we note that our study findings  
303 are highly consistent across census waves (**Table A5**). In different census waves, we found the  
304 similar systematic differences between p-CSSI and pp-CSSI. Second, migration could be an  
305 important factor influencing famine intensity measures, including CSSI. Using the 1% China  
306 2000 Census however we found that place of birth was highly comparable to place of residence  
307 for estimating CSSI at the province level (**Figure A6**). This is consistent with our finding that  
308 inter-province migration among births 1950-1970 was as low as 6%. A recent study also showed  
309 that migration within provinces is not associated with famine intensity (Kasahara and Li 2020).  
310 Third, despite the substantial rural-urban difference in famine intensity because government  
311 policies prioritized food security in urban areas (Garnaut 2014; Peng 1987; Zhao and Reimondos  
312 2012), our CSSI findings are not affected by ignoring urban populations. This can be explained  
313 by the fact that over 80 percent of Chinese population at the time lived in rural areas (Gørgens,

314 Meng and Vaithianathan 2012; Peng 1987). Forth, linear and higher order statistical models and  
315 varying pre-famine years to project trends over time give the same results.

316  
317 As a consequence, including post-famine births to estimating CSSIs has important consequences  
318 for understanding the relation between famine intensity experienced at the time of birth and  
319 health and economic outcomes in later life. In many current Chinese famine studies (**Table A1**),  
320 CSSI has been incorporated in regression models as a continuous measure of famine intensity.  
321 Changing cohort size trends of pre-famine births and post-famine births may not only affect  
322 CSSI estimates but also their distributions and the interpretation of study findings. We  
323 demonstrated that at the province level, pp-CSSI spreads more widely around the mean than p-  
324 CSSI. Using data from the tuberculosis surveillance study in Sichuan Province (Cheng et al.  
325 2020), we demonstrated that the dose-response relation between famine intensity and  
326 tuberculosis appears to be much weaker using p-CSSI than using pp-CSSI, irrespective of the  
327 type of census data used. Our findings demonstrate in many ways how the choice of non-famine  
328 years determines the nature of observed dose-response relationships between famine intensity at  
329 the time of birth and adult health and their interpretation.

330

### 331 **Strengths and Limitations**

332 Our study has many strengths. We use census data to construct robust measures of famine  
333 intensity and demonstrate that combining pre- & post-famine births can lead to unrecognized  
334 bias in estimating famine intensity using CSSI. In a study of later life health in Sichuan province,  
335 we show that combining pre- & post-famine births can amplify potential dose-response relations

336 between famine exposure level and tuberculosis health outcomes. These strengths provide the  
337 basis for our recommendations for the future analysis of famine studies in China.

338

339 There are also some limitations. There is no gold standard for famine intensity. CSSI is a good  
340 indicator however of famine related fertility changes and excess deaths; Census data could be  
341 biased by selective survival after famine exposure in early life. But in the one study we know on  
342 the question (Song, 2009) this does not seem to be the case and our findings based on census  
343 waves ten years apart are highly consistent; Migrations can potentially lead to biases but had  
344 little impact at the province level. Further studies will be needed on migration at the prefecture  
345 level; Potential misclassifications of place of birth could arise if pregnant women migrated  
346 during the famine and gave birth in another provinces. A child's place of birth was registered by  
347 mother's Hukou status however which neutralizes this concern (Zhu 2010).

348

### 349 **Suggestions for Future Studies**

350 We advocate the use of p-CSSI in Chinese famine studies to avoid biases related to different pre-  
351 famine and post-famine cohort size trends. Current studies (Cheng et al., 2020; Huang et al.,  
352 2014; Cheng Huang et al., 2010; Meng et al., 2015; Xu et al., 2016; Xu et al., 2018) should be re-  
353 analyzed with this concern in mind and divergent findings compared and discussed. For future  
354 studies, we provide data of p-CSSI and pp-CSSI at both the province and prefecture level in  
355 supplementary materials (**Table A7 of the online Appendix**). This information will be helpful in  
356 identifying provinces and prefectures across China where famine intensity was highest as these  
357 will be the most suitable locations for future famine studies. We first suggest studies in one or  
358 two of the most famine-severe provinces, including Sichuan and Anhui provinces (**Figure 4 &**



359 **Table A7 of the online Appendix**). Prefecture level studies could be attempted later, guided by  
360 substantial variations in famine intensity within province. These studies will generate improved  
361 estimates of famine intensity at the local level as improve estimates of the nature of dose-  
362 response relationships between famine exposure and its long-term impact.

363

## 364 **Conclusions**

365 Chinese famine studies to date have failed to recognize that cohort size trends among pre-famine  
366 births and post-famine births can differ substantially. This may be problematic as valid CSSI  
367 measures assume stable cohort size trends. We demonstrate for China that pre- & post-famine  
368 based CSSI is not a robust estimator of famine intensity as had been assumed previously. It will  
369 overestimate famine intensity at higher exposure levels and underestimate intensity at lower  
370 levels. As an alternative for Chinese famine studies, we therefore recommend CSSI based on  
371 pre-famine births alone.

372

## 373 **Data Availability**

374 All data and code necessary to reproduce the main findings of this study are available at the  
375 Github repository: [https://github.com/chunyu-yes/CSSI\\_famine\\_severity](https://github.com/chunyu-yes/CSSI_famine_severity).

376

## 377 **Acknowledgements**

378 The authors are particularly grateful to the Minnesota Population Center for providing the data of  
379 the 1% China 1990 and 2000 Census, the National Bureau of Statistics in China for originally  
380 producing the census data, and the research team at Berkely University for making the data of  
381 tuberculosis surveillance study in the Sichuan province publicly available.

382

383 **Author contributions**

384 C.L., C.L., and L.H.L designed research; C.L., C.L., H.X., Z.Z. and L.H.L performed research;

385 C.L., C.L., H.X., Z.Z. and L.H.L analyzed data; C.L., C.L., and L.H.L drafted the paper; H.X.

386 and Z.Z. provided technical support; and C.L., C.L., H.X., Z.Z. and L.H.L revised the paper.

387

## 388 **References**

- 389 Aird, J.S. (1982). Population studies and population policy in china. *Population and*  
390 *Development Review*, 8(2), 267-297.
- 391 Almond, D., L. Edlund, H. Li, and J. Zhang. (2007). *Long-term effects of the 1959-1961 china*  
392 *famine: Mainland china and hong kong* (Working Paper). National Bureau of Economic  
393 Research. <https://www.nber.org/papers/w13384>
- 394 Ashton, B., K. Hill, A. Piazza, and R. Zeitz. (1992). Famine in china, 1958–61. In *The*  
395 *population of modern china* (pp. 225-271). Springer.
- 396 Attane, I. (2002). China's family planning policy: An overview of its past and future. *Studies in*  
397 *Family Planning*, 33(1), 103-113.
- 398 Banister, J. (1984). An analysis of recent data on the population of china. *Population and*  
399 *Development review*, 10(2), 241-271.
- 400 Cai, Y.and W. Feng. (2005). Famine, social disruption, and involuntary fetal loss: Evidence from  
401 chinese survey data. *Demography*, 42(2), 301-322.
- 402 Cao, S. (2005). The deaths of china's population and its root cause during 1959-1961 (in  
403 chinese). *Chinese Journal of Population Science*, 1, 14-28.
- 404 Center, M.P. (2020). *Integrated public use microdata series, international: Version 7.3* [Data  
405 set]. Minneapolis, MN: IPUMS. <https://doi.org/https://doi.org/10.18128/D020.V7.2>
- 406 Chang, G.H.and G.J. Wen. (1997). Communal dining and the chinese famine of 1958–1961.  
407 *Economic Development and Cultural Change*, 46(1), 1-34.
- 408 Chang, G.H.and G.J. Wen. (1998). Food availability versus consumption efficiency: Causes of  
409 the chinese famine. *China Economic Review*, 9(2), 157-165.

- 410 Cheng, Q., P.A. Collender, J.R. Head, C.M. Hoover, J.L. Zelner, A.S. Mahmud, and J.V.  
411 Remais. (2021). Reply to li et al.: Estimate of the association between tb risk and famine  
412 intensity is robust to various famine intensity estimators. *Proceedings of the National*  
413 *Academy of Sciences*, 118(16), e2103254118.
- 414 Cheng, Q., R. Trangucci, K.N. Nelson, W. Fu, P.A. Collender, J.R. Head, C.M. Hoover, N.K.  
415 Skaff, T. Li, and X. Li. (2020). Prenatal and early-life exposure to the great chinese  
416 famine increased the risk of tuberculosis in adulthood across two generations.  
417 *Proceedings of the National Academy of Sciences*, 117(44), 27549-27555.
- 418 Coale, A.J.and J. Banister. (1994). Five decades of missing females in china. *Demography*,  
419 31(3), 459-479.
- 420 Coale, A.J.and S.L. Chen. (1987). *Basic data on fertility in the provinces of china, 1940-82* (Vol.  
421 104). Papers of the East-West Population Institutue.
- 422 Fan, W.and Y. Qian. (2015). Long-term health and socioeconomic consequences of early-life  
423 exposure to the 1959–1961 chinese famine. *Social Science Research*, 49, 53-69.
- 424 Garnaut, A. (2014). The geography of the great leap famine. *Modern China*, 40(3), 315-348.
- 425 Gørgens, T., X. Meng, and R. Vaithianathan. (2012). Stunting and selection effects of famine: A  
426 case study of the great chinese famine. *Journal of Development Economics*, 97(1), 99-  
427 111.
- 428 Gráda, C.Ó. (2009). Chapter i: The third horseman. In *Famine: A short history* (pp. 1-44).  
429 Princeton University Press.
- 430 Howe, P.and S. Devereux. (2004). Famine intensity and magnitude scales: A proposal for an  
431 instrumental definition of famine. *Disasters*, 28(4), 353-372.

- 432 Huang, C., C. Guo, C. Nichols, S. Chen, and R. Martorell. (2014). Elevated levels of protein in  
433 urine in adulthood after exposure to the chinese famine of 1959–61 during gestation and  
434 the early postnatal period. *International Journal of Epidemiology*, 43(6), 1806-1814.
- 435 Huang, C., Z. Li, K.V. Narayan, D. Williamson, and R. Martorell. (2010a). Bigger babies born to  
436 women survivors of the 1959–1961 chinese famine: A puzzle due to survival selection?  
437 *Journal of Developmental Origins of Health and Disease*, 1(6), 412-418.
- 438 Huang, C., Z. Li, M. Wang, and R. Martorell. (2010b). Early life exposure to the 1959–1961  
439 chinese famine has long-term health consequences. *The Journal of Nutrition*, 140(10),  
440 1874-1878.
- 441 Huang, C., M.R. Phillips, Y. Zhang, J. Zhang, Q. Shi, Z. Song, Z. Ding, S. Pang, and R.  
442 Martorell. (2013). Malnutrition in early life and adult mental health: Evidence from a  
443 natural experiment. *Social Science & Medicine*, 97, 259-266.
- 444 Kasahara, H. and B. Li. (2020). Grain exports and the causes of china's great famine, 1959–1961:  
445 County-level evidence. *Journal of Development Economics*, 146, 102513.
- 446 Kung, J.K.-s. and J.Y. Lin. (2003). The causes of china's great leap famine, 1959–1961.  
447 *Economic Development and Cultural Change*, 52(1), 51-73.
- 448 Lavelly, W. (2001). First impressions from the 2000 census of china. *Population and  
449 Development Review*, 27(4), 755-769.
- 450 Li, C. (2022). *Prenatal famine exposure and later-life risk of type 2 diabetes: Examining the  
451 relationship in a national longitudinal study in china* (Publication Number Chapter 3)  
452 Mailman School of Public Health, Columbia University].

- 453 Li, C.and L. Lumey. (2017). Exposure to the chinese famine of 1959–61 in early life and long-  
454 term health conditions: A systematic review and meta-analysis. *International Journal of*  
455 *Epidemiology*, 46(4), 1157-1170.
- 456 Li, C., E.W. Tobi, B.T. Heijmans, and L. Lumey. (2019). The effect of the chinese famine on  
457 type 2 diabetes mellitus epidemics. *Nature Reviews Endocrinology*, 15(6), 313-314.
- 458 Li, C., Z. Zhou, and L. Lumey. (2021). Early-life exposure to the chinese famine and  
459 tuberculosis risk: Unrecognized biases from different measures of famine intensity.  
460 *Proceedings of the National Academy of Sciences*, 118(16), e2102809118.
- 461 Lin, J.Y.and D.T. Yang. (1998). On the causes of china's agricultural crisis and the great leap  
462 famine. *China Economic Review*, 9(2), 125-140.
- 463 Lin, J.Y.and D.T. Yang. (2000). Food availability, entitlements and the chinese famine of 1959–  
464 61. *The Economic Journal*, 110(460), 136-158.
- 465 Lumey, L.H., A.D. Stein, and E. Susser. (2011). Prenatal famine and adult health. *Annual Review*  
466 *of Public Health*, 32, 237-262.
- 467 Meng, X., N. Qian, and P. Yared. (2015). The institutional causes of china's great famine, 1959–  
468 1961. *The Review of Economic Studies*, 82(4), 1568-1611.
- 469 Peng, X. (1987). Demographic consequences of the great leap forward in china's provinces.  
470 *Population and Development Review*, 13(4), 639-670.
- 471 Poston, D.L. (1992). Fertility trends in china. In *The population of modern china* (pp. 277-285).  
472 Springer.
- 473 Poston Jr, D.L.and B. Gu. (1987). Socioeconomic development, family planning, and fertility in  
474 china. *Demography*, 24(4), 531-551.

- 475 Rudnytskyi, O., N. Levchuk, O. Wolowyna, P. Shevchuk, and A. Kovbasiuk. (2015).  
476 Demography of a man-made human catastrophe: The case of massive famine in ukraine  
477 1932-1933. *Canadian Studies in Population [ARCHIVES]*, 42(1-2), 53-80.
- 478 Sabit, M. and Y. Mamat. (2008). Analysis of population changes and its causative factors in  
479 xinjiang in the last 50 years (in chinese). *Journal of Arid Land Resources and*  
480 *Environment*, 4, 114-119.
- 481 Song, S., W. Wang, and P. Hu. (2009). Famine, death, and madness: Schizophrenia in early  
482 adulthood after prenatal exposure to the chinese great leap forward famine. *Social*  
483 *Science & Medicine*, 68(7), 1315-1321.
- 484 Xizhe, P. (1989). Major determinants of china's fertility transition. *The China Quarterly*, 117, 1-  
485 37.
- 486 Xu, H., L. Li, Z. Zhang, and J. Liu. (2016). Is natural experiment a cure? Re-examining the long-  
487 term health effects of china's 1959–1961 famine. *Social Science & Medicine*, 148, 110-  
488 122.
- 489 Xu, H., Z. Zhang, L. Li, and J. Liu. (2018). Early life exposure to china's 1959–61 famine and  
490 midlife cognition. *International Journal of Epidemiology*, 47(1), 109-120.
- 491 Yang, D.L. (1996). *Calamity and reform in china: State, rural society, and institutional change*  
492 *since the great leap famine*. Stanford University Press.
- 493 Yang, F. (2004). *Historical research on family planning of contemporary china (in chinese)*  
494 [PhD, Zhejiang University].
- 495 Zhao, Z. and A. Reimondos. (2012). The demography of china's 1958-61 famine. *Population*,  
496 67(2), 281-308.

497 Zhu, J. (2010). The household registration policy of yesterday, today and tomorrow (in chinese).

498 *Newsletter About Work in Rural Areas*(18), 17-17.

499



## Figures

| Study | Article          | Studies cited          |
|-------|------------------|------------------------|
| 1     | X. Meng 2006     |                        |
| 2     | X. Meng 2009     | 1                      |
| 3     | X. Meng 2010     | 2                      |
| 4     | C. Huang 2010a   |                        |
| 5     | C. Huang 2010b   | 4                      |
| 6     | Q. Li 2012       | 4                      |
| 7     | C. Huang 2013    | 2 3 4                  |
| 8     | S. Song 2013a    | 4 5                    |
| 9     | S. Song 2013b    | 2 4 5                  |
| 10    | C. Huang 2014    | 4 5 6 7                |
| 11    | A. Garnaut 2014  | 3                      |
| 12    | S. Song 2014     | 2 4 8 9                |
| 13    | Y. Chen 2015     | 2 3 11                 |
| 14    | W. Fan 2015      | 2 4 7                  |
| 15    | J. Chu 2016      | 2 3 11                 |
| 16    | H. Xu 2016       | 2 14 4 5 7 8 9         |
| 17    | L. Zhang 2017    | 2 3                    |
| 18    | H. Xu 2018       | 2 4 5 16 11 12         |
| 19    | P. He 2018a      | 3 4 5 7 8 10           |
| 20    | P. He 2018b      | 3 4 5 7 9              |
| 21    | H. Fang 2019     | 3                      |
| 22    | Q. Cheng 2020    | 4 16 18                |
| 23    | H. Kasahara 2020 | 2 15                   |
| 24    | J. Li 2020       | 2 3 14 4               |
| 25    | J. Kung 2021     | 2                      |
| 26    | Z. Cheng 2021a   | 3 16                   |
| 27    | Z. Cheng 2021b   | 14 17 24 4 7 8 9 18 13 |
| 28    | P. Sur 2021      | 2 3                    |
| 29    | Y. Li 2021       | 3 14 7 16 18 19 23     |
| 30    | Z. Cheng 2021c   | 3 15 24 25             |
| 31    | D. Xie 2022      | 3 16 18                |

● Economics   
 ● Health   
 ● Demography   
 ● Politics

**Fig. 1** Chinese famine studies using cohort size shrinkage index (CSSI). Detailed information of listed studies is available in Table A1.

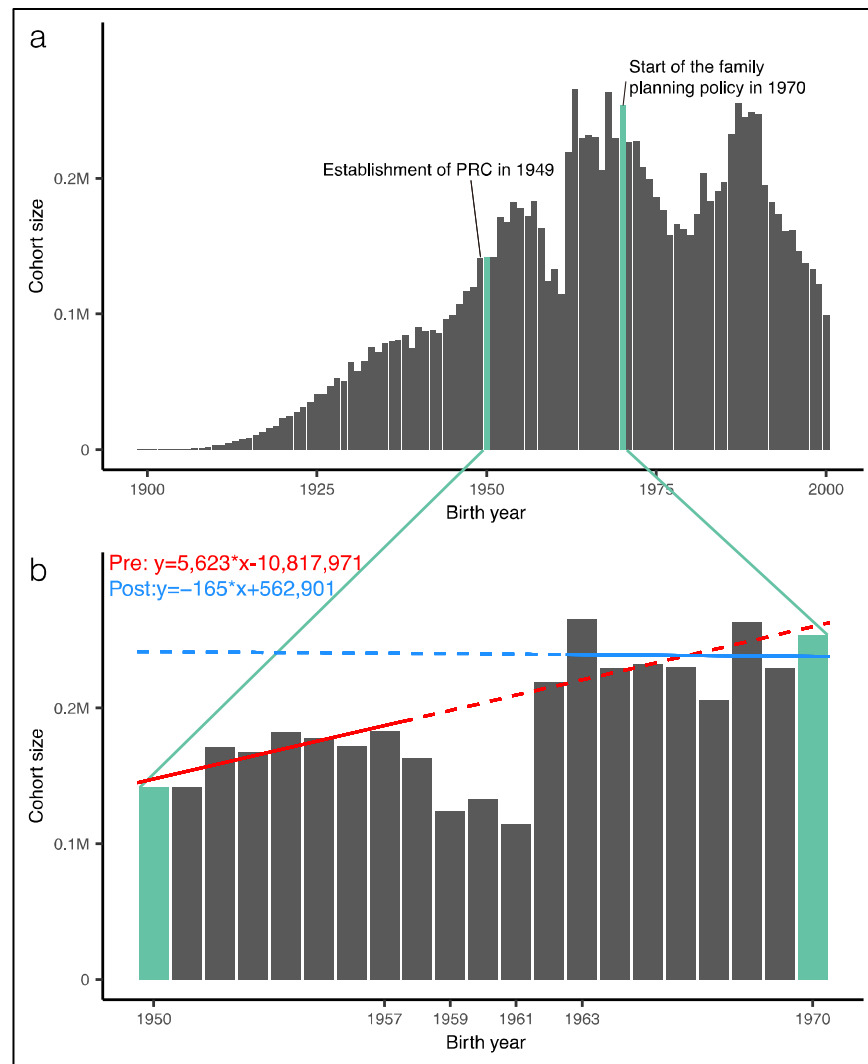

**Fig. 2** Cohort size by birth year in China.

*Notes:* a. Cohort size by birth year, 1990-2000. b. Cohort size trend from linear regression either based on either pre-famine births (1950-1957) or post-famine births (1963-1970).

*Source:* 1% China 2000 Census, place of birth.

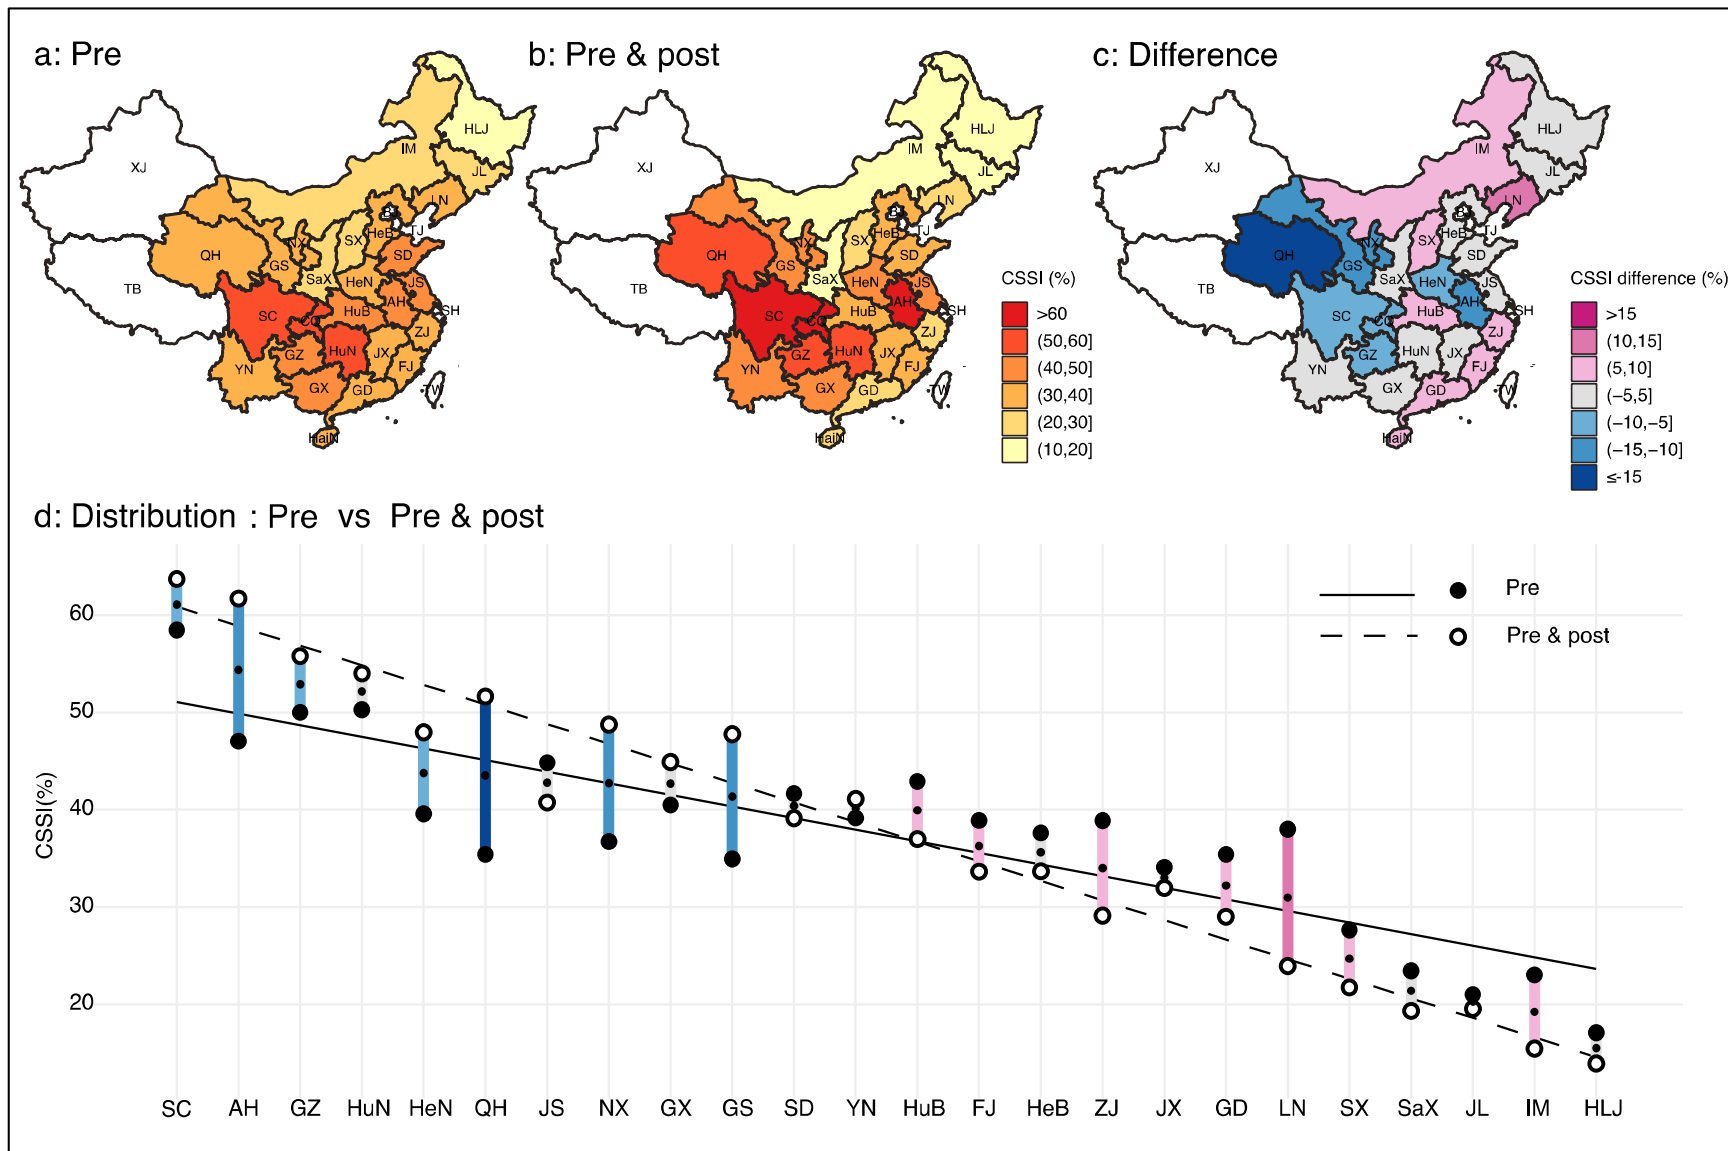

**Fig. 3** P-CSSI, pp-CSSI, and their difference at the province level.

*Notes:* a. Provincial p-CSSI (%) based on births in 1950-57. b. Provincial pp-CSSI (%) based on births in 1950-57 & 1963-70. c. Difference of provincial CSSI (%) between panel a and panel b. d. Provinces are ordered by the average of p-CSSIs and pp-CSSIs. The solid line represents the linear regression of p-CSSI (filled circles) over the average of the two CSSIs. The dash line represents the linear regression of pp-CSSI (unfilled circles) over the average of two CSSIs. Each bar represents the difference of p-CSSIs and pp-CSSIs for each province, and its color coding follows the panel c. Full names corresponding to province abbreviations can be found in ‘Data and Methods’ section.

*Source:* 1% China 2000 Census, place of birth.

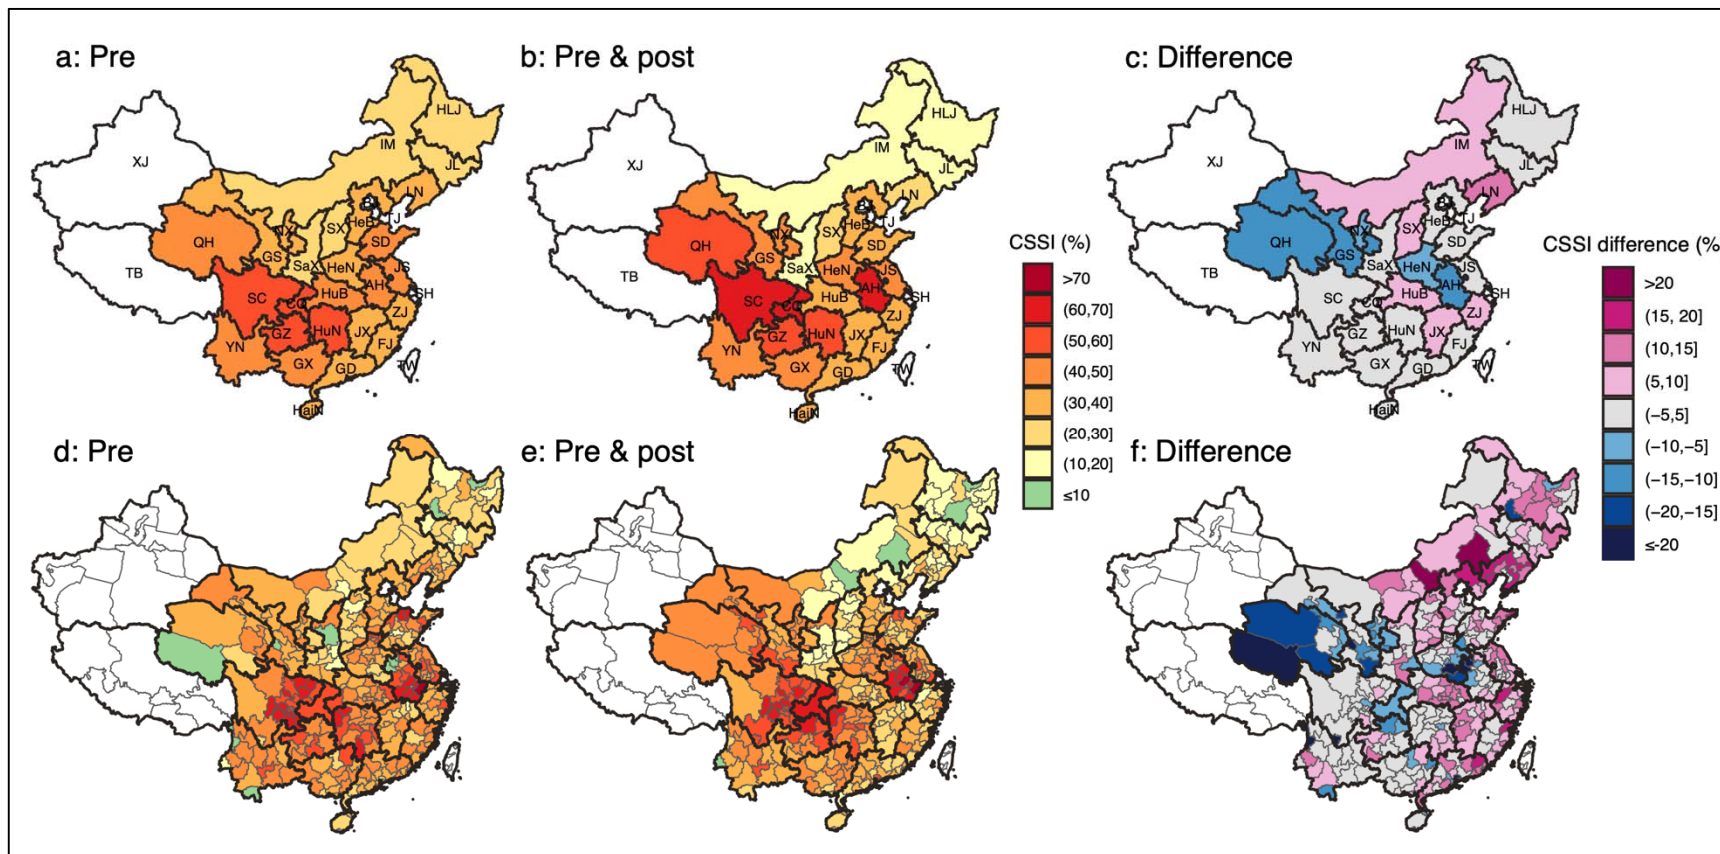

**Fig. 4** P-CSSI, pp-CSSI, and their difference at the province level (a-c) and prefecture level (d-f).

*Notes:* a and d: Provincial and prefecture p-CSSI (%) based on births in 1950-57. b and e: Provincial and prefecture pp-CSSI (%) based on births in 1950-57 & 1963-70. c: Difference of provincial CSSI (%) between a and b. f: Difference of prefecture CSSI (%) between d and e.

*Source:* 1% China 2000 Census, place of residence.

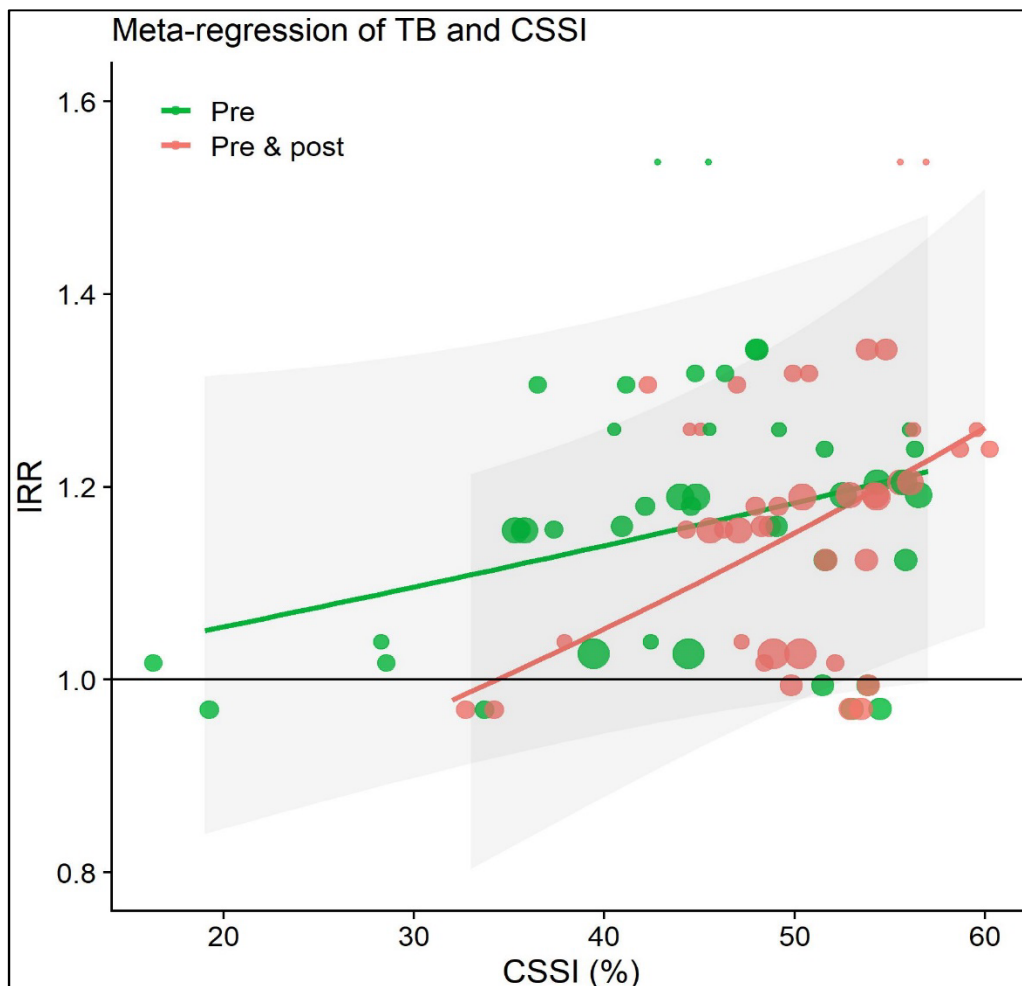

**Fig. 5** Scatterplot of CSSI and incidence rate ratio (IRR) of tuberculosis among F1 across prefectures in Sichuan province  
*Notes:* Each prefecture is represented by a dot. The size of the dot is proportional to the inverse variance of the estimated IRR of each prefecture. The lines represent the meta-regression fits, and the shaded areas represent the 95% CIs.  
*Source:* Full Sichuan 2000 Census, age at the time of the census and place of residence.
